# Supplementary material
Source: PubMed Central journal article supplement (PMC10548885)
Supplement: NIHMS1928026-supplement-Supplementary_Tables.pdf [file NIHMS1928026-supplement-Supplementary_Tables.pdf]

Supplementary Table.T1. Characteristics of primary resection study population

| Characteristic                           | Institution |           |           | Total     |
|------------------------------------------|-------------|-----------|-----------|-----------|
|                                          | DF/BWCC     | URMC      | SCI       |           |
| Number of subjects                       | 105         | 74        | 110       | 289       |
| Men (n, %)                               | 44(42%)     | 42(57%)   | 68(62%)   | 154(53%)  |
| Age (median, IQR), years                 | 64(58-71)   | 67(59-72) | 69(63-75) | 67(59-73) |
| Race (n, %)                              |             |           |           |           |
| White                                    | 79(75%)     | 67(91%)   | 83(75%)   | 229(79%)  |
| Black                                    | 1(1%)       | 3(4%)     | 1(1%)     | 5(2%)     |
| Asian                                    | 1(1%)       | 1(1%)     | 22(20%)   | 24(8%)    |
| Other                                    | 24(23%)     | 3(4%)     | 2(4%)     | 31(11%)   |
| pT stage (n, %)                          |             |           |           |           |
| T1-T2                                    | 86(82%)     | 48(65%)   | 83(75%)   | 217(75%)  |
| T3-T4                                    | 19(18%)     | 26(35%)   | 27(25%)   | 72(25%)   |
| pN stage (n, %)                          |             |           |           |           |
| N0                                       | 31(29%)     | 17(23%)   | 37(34%)   | 85(30%)   |
| N1                                       | 44(42%)     | 27(36%)   | 37(34%)   | 108(37%)  |
| N2                                       | 30(29%)     | 30(41%)   | 36(32%)   | 96(33%)   |
| Tumor grade (n, %)                       |             |           |           |           |
| Well/Moderately differentiated           | 55(52%)     | 38(51%)   | 73(66%)   | 166(57%)  |
| Poorly differentiated / Undifferentiated | 48(46%)     | 35(47%)   | 34(31%)   | 117(41%)  |
| Unknown                                  | 2(2%)       | 1(2%)     | 3(3%)     | 6(2%)     |
| Lymphovascular invasion (n, %)           |             |           |           |           |
| Negative                                 | 45(43%)     | 26(35%)   | 54(49%)   | 125(43%)  |
| Positive                                 | 51(49%)     | 46(62%)   | 37(34%)   | 134(47%)  |
| Unknown                                  | 9(8%)       | 2(3%)     | 19(17%)   | 30(10%)   |
| Resection margin status (n, %)           |             |           |           |           |
| R0                                       | 40(38%)     | 40(54%)   | 63(57%)   | 143(49%)  |
| R1                                       | 63(60%)     | 34(46%)   | 44(40%)   | 141(49%)  |
| R2                                       | 2(2%)       | 0(0)      | 2(2%)     | 4(1%)     |
| Rx (not evaluable)                       | 0(0)        | 0(0)      | 1(1%)     | 1(<1%)    |
| Adjuvant systemic chemotherapy (n, %)    |             |           |           |           |
| No                                       | 29(28%)     | 20(27%)   | 34(31%)   | 83(29%)   |
| Yes                                      | 72(68%)     | 49(66%)   | 58(53%)   | 179(62%)  |
| Unknown                                  | 4(4%)       | 5(7%)     | 18(16%)   | 27(9%)    |
| Adjuvant radiation therapy (n, %)        |             |           |           |           |
| No                                       | 44(42%)     | 43(58%)   | 61(56%)   | 148(51%)  |
| Yes                                      | 57(54%)     | 26(35%)   | 31(28%)   | 114(40%)  |
| Unknown                                  | 4(4%)       | 5(7%)     | 18(16%)   | 27(9%)    |

**Supplementary Table.T1. Characteristics of primary resection cohort population.** The primary resection cohort comprised 289 primary resection specimens with full clinicopathologic annotation as detailed in the table. DF/BWCC: Dana-Farber/Brigham and Women's Cancer Centre, URM: University of Rochester Medical Centre, SCI: Stanford Cancer Institute.

Supplementary Table.T2. Types of adjuvant therapy received by patients in the primary resection cohort.

| <b>Adjuvant chemotherapy</b> | <b>N (%) cases<br/>(total N=289)</b> |
|------------------------------|--------------------------------------|
| No adjuvant chemotherapy     | 83 (28.7%)                           |
| Gemcitabine                  | 153 (52.9%)                          |
| Gemcitabine combination      | 19 (6.5%)                            |
| 5-FU/LV or capecitabine      | 2 (0.7%)                             |
| FOLFOX                       | 1 (0.4%)                             |
| FOLFIRINOX                   | 1 (0.4%)                             |
| Unknown                      | 29 (10%)                             |
| Other                        | 1 (0.4%)                             |

**Supplementary Table.T2. Types of adjuvant therapy received by patients in the primary resection cohort.**

Supplementary Table.T3. Characteristics of metastatic biopsy study population

| Characteristic                                    | Total      |
|---------------------------------------------------|------------|
| Number of subjects                                | 37         |
| Men (n, %)                                        | 16 (43.2%) |
| Age (median, IQR), years                          | 65 (61-65) |
| Race (n, %)                                       |            |
| White                                             | 35 (94.6%) |
| Black                                             | 0          |
| Asian                                             | 0          |
| Other                                             | 1 (2.7%)   |
| Unknown                                           | 1 (2.7%)   |
| pT stage (n, %)                                   |            |
| T1-T2                                             | 7 (18.9%)  |
| T3-T4                                             | 8 (21.6%)  |
| Tx                                                | 2 (5.4%)   |
| Unknown                                           | 20 (54%)   |
| pN stage (n, %)                                   |            |
| N0                                                | 6 (16.2%)  |
| N1                                                | 7 (18.9%)  |
| N2                                                | 1 (2.7%)   |
| Nx                                                | 3 (8.1%)   |
| Unknown                                           | 20 (54%)   |
| Tumor grade (n, %)                                |            |
| Well/Moderately differentiated                    | 13 (35.2%) |
| Moderately differentiated / Poorly differentiated | 3 (8.1%)   |
| Poorly differentiated / Undifferentiated          | 8 (21.6%)  |
| Unknown                                           | 13 (35.1%) |
| Lymphovascular invasion (n, %)                    |            |
| Negative                                          | 12 (32.4%) |
| Positive                                          | 22 (59.5%) |
| Unknown                                           | 3 (8.1%)   |

**Supplementary Table.T3. Characteristics of metastatic biopsy study population.** The metastatic biopsy cohort comprised 37 metastatic biopsy specimens. 24 cases had matched fresh frozen metastatic biopsies of which 14 had bulk RNA sequencing and 10 had single-cell RNA sequencing data available. All 37 cases had full clinopathological annotation as detailed in the table.

Supplementary Table.T4. Characteristics of patient derived organoid study population.

| Characteristic                                                   | Total      |
|------------------------------------------------------------------|------------|
| Number of subjects                                               | 77         |
| Men (n, %)                                                       | 50 (65%)   |
| Age (median, IQR), years                                         | 67 (60-75) |
| Race (n, %)                                                      |            |
| White                                                            | 66 (85.7%) |
| Black                                                            | 0          |
| Asian                                                            | 5 (6.5%)   |
| Other                                                            | 1 (1.3%)   |
| Unknown                                                          | 5 (6.5%)   |
| pT stage (n, %)                                                  |            |
| T1-T2                                                            | 24 (31.2%) |
| T3-T4                                                            | 23 (29.8%) |
| Tx                                                               | 2 (2.6%)   |
| Unknown                                                          | 28 (36.4%) |
| pN stage (n, %)                                                  |            |
| N0                                                               | 19 (24.7%) |
| N1                                                               | 20 (26%)   |
| N2                                                               | 3 (3.9%)   |
| Nx                                                               | 7 (9%)     |
| Unknown                                                          | 28 (36.4%) |
| Tumor grade (n, %)                                               |            |
| Well/Moderately differentiated                                   | 25 (32.5%) |
| Moderately differentiated / Poorly differentiated                | 8 (10.4%)  |
| Poorly differentiated / Undifferentiated                         | 15 (19.5%) |
| Unknown                                                          | 29 (37.7%) |
| Lymphovascular invasion (n, %)                                   |            |
| Negative                                                         | 19 (24.7%) |
| Positive                                                         | 56 (72.7%) |
| Unknown                                                          | 2 (2.6%)   |
| Organoid passage number at assessment (n, %)                     |            |
| 1-5                                                              | 13 (16.9%) |
| 6-10                                                             | 18 (23.4%) |
| 11-15                                                            | 24 (31.2%) |
| >15                                                              | 22 (28.5%) |
| Patient tissue site of origin for organoid culture (n, %)        |            |
| Ascites fluid                                                    | 13 (16.9%) |
| Liver                                                            | 31 (40.2%) |
| Omentum                                                          | 4 (5.2%)   |
| Pancreas                                                         | 28 (36.4%) |
| Retroperitoneal lymph node                                       | 1 (1.3%)   |
| Prior systemic treatment before patient tissue collection (n, %) |            |
| Yes                                                              | 44 (57.1%) |
| No                                                               | 33 (42.9%) |

**Supplementary Table.T4. Characteristics of patient derived organoid study population.** The patient derived organoid cohort comprised 77 cases with clincipathological annotation as detailed.



Supplementary Table.T5. Summary of protein subtype markers

| Marker                        | Subtype classification in protein panel | Summary                                                                                                                               | Reference                                                                                                                                                                                                                                                             |
|-------------------------------|-----------------------------------------|---------------------------------------------------------------------------------------------------------------------------------------|-----------------------------------------------------------------------------------------------------------------------------------------------------------------------------------------------------------------------------------------------------------------------|
| Claudin 18.2 (CLDN18.2)       | Classical                               | Clinical trial for inhibitor IMAB362 in combination with CAPOX for CLDN18.2 positive patients by IHC                                  | Clinical trial: NCT03653507                                                                                                                                                                                                                                           |
|                               |                                         | CLDN18 immunohistochemistry used as biomarker in Zolbetuximab trial targeting CLDN18.2 positive cells in combination with Gemcitabine | Türeci, Özlem, Mitnacht-kraus, R., Wöll, S. & Yamada, T. Characterization of zolbetuximab in pancreatic cancer models. <i>Oncoimmunology</i> <b>8</b> , 1–10 (2019)                                                                                                   |
|                               |                                         | CLDN18.2 RNA upregulated in classical subtype                                                                                         | Lomberk, G. <i>et al.</i> Distinct epigenetic landscapes underlie the pathobiology of pancreatic cancer subtypes. <i>Nat. Commun.</i> <b>9</b> , 1978 (2018).                                                                                                         |
|                               |                                         | CLDN18 RNA differentially expressed in pancreatic cancer                                                                              | Karanjawala, Z. E. <i>et al.</i> New markers of pancreatic cancer identified through differential gene expression analyses: claudin 18 and annexin A8. <i>Afile:///C:/Users/hlw18/Downloads/nihms105560(1).pdfmerican J. Surg. Pathol.</i> <b>32</b> , 188–196 (2008) |
| Trefoil factor 1 (TFF1)       | Classical                               | Upregulated in classical subtypes                                                                                                     | Collisson, E. A. <i>et al.</i> Subtypes of pancreatic ductal adenocarcinoma and their differing responses to therapy. <i>Nat. Med.</i> <b>17</b> , 500–503 (2011).                                                                                                    |
|                               |                                         | Identified as top 5 most differentially expressed genes between classical and basal-like cells from tumor samples by scRNA-seq        | Zhou, D. C. <i>et al.</i> Spatial drivers and pre-cancer populations collaborate with the microenvironment in untreated and chemo-resistant pancreatic cancer. <i>bioRxiv</i> 2021.01.13.426413 (2021) doi:10.1101/2021.01.13.426413.                                 |
|                               |                                         | Included in 50-gene set to determine classical subtype                                                                                | Moffitt, R. A. <i>et al.</i> Virtual microdissection identifies distinct tumor- and stroma-specific subtypes of pancreatic ductal adenocarcinoma. <i>Nat. Genet.</i> <b>47</b> , 1168–1178 (2015).                                                                    |
|                               |                                         | Increased gene expression in L1 subtype which corresponds with Collisson and Moffitt classical subtype                                | Zhao, L., Zhao, H. & Yan, H. Gene expression profiling of 1200 pancreatic ductal adenocarcinoma reveals novel subtypes. <i>BMC Cancer</i> <b>18</b> , 603 (2018).                                                                                                     |
|                               |                                         | Upregulated in progenitor subtype                                                                                                     | Bailey, P. <i>et al.</i> Genomic analyses identify molecular subtypes of pancreatic cancer. <i>Nature</i> <b>531</b> , 47–52 (2016).                                                                                                                                  |
| GATA-binding factor 6 (GATA6) | Classical                               | Distinguishes classical subtype                                                                                                       | Kane, G. M. <i>et al.</i> GATA6 Expression Distinguishes Classical and Basal-like Subtypes in Advanced Pancreatic Cancer. <i>Clin. Cancer Res.</i> <b>26</b> , 4901 LP – 4910 (2020).                                                                                 |
|                               |                                         | Biomarker of response                                                                                                                 | Clinical trial NCT04472910                                                                                                                                                                                                                                            |

|                                          |       |                                                                                                                              |                                                                                                                                                                                                                            |
|------------------------------------------|-------|------------------------------------------------------------------------------------------------------------------------------|----------------------------------------------------------------------------------------------------------------------------------------------------------------------------------------------------------------------------|
|                                          |       |                                                                                                                              |                                                                                                                                                                                                                            |
|                                          |       | Biomarker of response                                                                                                        | Clinical trial NCT04469556                                                                                                                                                                                                 |
|                                          |       | GATA6 highly expressed in classical tumors                                                                                   | Collisson, E. A. <i>et al.</i> Subtypes of pancreatic ductal adenocarcinoma and their differing responses to therapy. <i>Nat. Med.</i> <b>17</b> , 500–503 (2011).                                                         |
| S100 calcium binding protein A2 (S100A2) | Basal | Associated with squamous basal PDAC and hypermethylated in progenitor subtype                                                | Bailey, P. <i>et al.</i> Genomic analyses identify molecular subtypes of pancreatic cancer. <i>Nature</i> <b>531</b> , 47–52 (2016).                                                                                       |
|                                          |       | Increased expression in basal subtype                                                                                        | Moffitt, R. A. <i>et al.</i> Virtual microdissection identifies distinct tumor- and stroma-specific subtypes of pancreatic ductal adenocarcinoma. <i>Nat. Genet.</i> <b>47</b> , 1168–1178 (2015).                         |
|                                          |       | Increased expression in quasi-mesenchymal subtype                                                                            | Collisson, E. A. <i>et al.</i> Subtypes of pancreatic ductal adenocarcinoma and their differing responses to therapy. <i>Nat. Med.</i> <b>17</b> , 500–503 (2011).                                                         |
| Keratin 17 (KRT17)                       | Basal | Most lethal molecular subtype                                                                                                | Roa-Peña, L. <i>et al.</i> Keratin 17 identifies the most lethal molecular subtype of pancreatic cancer. <i>Sci. Rep.</i> <b>9</b> , 11239 (2019).                                                                         |
|                                          |       | Increased gene expression in L2 subtype which corresponds with Moffitt basal subtype and Collisson quasi-mesenchymal subtype | Zhao, L., Zhao, H. & Yan, H. Gene expression profiling of 1200 pancreatic ductal adenocarcinoma reveals novel subtypes. <i>BMC Cancer</i> <b>18</b> , 603 (2018).                                                          |
|                                          |       | KRT17 expressing PDAC correlates with resistance to Gemcitabine and 5-FU                                                     | Pan, C.-H. <i>et al.</i> An unbiased high-throughput drug screen reveals a potential therapeutic vulnerability in the most lethal molecular subtype of pancreatic cancer. <i>Mol. Oncol.</i> <b>14</b> , 1800–1816 (2020). |
|                                          |       | Correlation of response to chemotherapy and resistance                                                                       | Clinical trial NCT04469556                                                                                                                                                                                                 |
| Keratin 5 (KRT5)                         | Basal | KRT5 associated with squamous cell lineage                                                                                   | Somerville, T. D. D. <i>et al.</i> TP63-Mediated Enhancer Reprogramming Drives the Squamous Subtype of Pancreatic Ductal Adenocarcinoma. <i>Cell Rep.</i> <b>25</b> , 1741-1755.e7 (2018).                                 |
|                                          |       | GATA6-silenced cells express KRT5                                                                                            | Martinelli, P. <i>et al.</i> GATA6 regulates EMT and tumour dissemination, and is a marker of response to adjuvant chemotherapy in pancreatic cancer. <i>Gut</i> <b>66</b> , 1665 LP – 1676 (2017).                        |

**Supplementary Table.T5. Summary of subtype markers selected for subtype determination.** The subtype markers selected for the multiplex immunofluorescence assay are highlighted in the table and were selected based upon their importance across multiple studies for determining tumor subtypes, biological underpinning of the specific subtypes and relevance as biomarkers in clinical trials.

Supplementary Table.T6. Summary of primary antibodies and Opal fluorophores used in the the multiplex immunofluorescence assay.

| Purpose                  | Marker     | Clone          | Manufacturer, catalogue number | Antibody dilution | Fluorophore | Manufacturer, Catalogue number | Fluorophore dilution | Antigen retrieval prior to primary antibody |
|--------------------------|------------|----------------|--------------------------------|-------------------|-------------|--------------------------------|----------------------|---------------------------------------------|
| Classical subtype marker | Cldn18.2   | EPR19202-244   | Abcam, 241330                  | 1:700             | Opal 570    | FP1488001KT                    | 1:300                | ER1                                         |
| Classical subtype marker | GATA6      | D61E4          | CST, 5851                      | 1:400             | Opal 540    | FP1494001KT                    | 1:300                | ER1                                         |
| Classical subtype marker | TFF1       | EPR3972        | Abcam, 92377                   | 1:1500            | Opal 690    | FP1497001KT                    | 1:200                | ER1                                         |
| Basal subtype marker     | Keratin-17 | E3             | ThermoFisher, MA513539         | 1:75              | Opal 520    | FP1487001KT                    | 1:300                | ER2                                         |
| Basal subtype marker     | Keratin-5  | EP1601Y        | Abcam, 52635                   | 1:500             | Opal 480    | FP1500001KT                    | 1:300                | ER1                                         |
| Basal subtype marker     | S100a2     | EPR5392        | Abcam, 109494                  | 1:2500            | Opal 650    | FP1496001KT                    | 1:1000               | ER1                                         |
| Epithelial marker        | CKPAN      | AE1/AE3<br>C11 | Dako, M3515;<br>CST, 4545      | 1:50<br>1:500     | Opal 620    | FP1495001KT                    | 1:300                | ER1                                         |

**Supplementary Table.T6. Summary of primary antibodies and Opal fluorophores used in subtyping assay.** Details of primary antibody dilutions and Opal fluorophore pairings.

Supplementary Table.T7. List of ancillary reagents used in the multiplex immunofluorescence assay.

| <b>Reagent</b>                           | <b>Manufacturer, catalogue number</b> |
|------------------------------------------|---------------------------------------|
| Xylene                                   | Fisher Scientific, X3P1GAL            |
| Ethanol                                  | Fisher Scientific, HC-800-1GAL        |
| BOND Epitope Retrieval Solution 1        | Leica Biosystems, AR9961              |
| BOND Epitope Retrieval Solution 2        | Leica Biosystems, AR9640              |
| Antibody diluent/block                   | Akoya Biosciences, ARD1001EA          |
| Secondary Opal polymer HRP Ms + Rb       | Akoya Biosciences, ARH1001EA          |
| 1x Plus Automation Amplification Diluent | Akoya Biosciences, FP1609             |
| Spectral DAPI                            | Akoya Biosciences, FP1490             |
| ProLong Gold Antifade Mountant           | Fisher Scientific, P36930             |

**Supplementary Table.T7. List of reagents used in the multiplex immunofluorescence assay.**

Details of all reagents used for multiplex immuofluorescence assay on the Leica BOND RX Research Stainer (Leica Biosystems, Buffalo, IL).

Supplementary Table.T8. Single marker z-scored mean intensity positive thresholds.

| Subtype marker | Z-scored fluorescence mean marker intensity threshold for cell positivity (raw mean intensity range) |
|----------------|------------------------------------------------------------------------------------------------------|
| CLDN18.2       | 2 (0.4-0.85)                                                                                         |
| TFF1           | 1.5 (4.8-6.3)                                                                                        |
| GATA6          | 1 (1.2-2.8)                                                                                          |
| KRT17          | 0.5 (0.6-1.4)                                                                                        |
| KRT5           | 0.5 (0.25-0.89)                                                                                      |
| S100A2         | 2 (2-5.8)                                                                                            |



**Supplementary Table.T8. Single marker immunofluorescence gating parameters.** Raw mean intensities for each marker were normalized per TMA to account for potential variability in staining performance based upon tissue institute of origin. Following normalization, z-scored fluorescence marker intensity 'gates' were determined to classify cells as positive or negative for each single marker.



**Supplementary Table.T9. Cell subtype marker combinations and subtypes.** A combinatorial approach to cell subtype determination was devised. Each cell was assessed for expression of each of the 6 markers in the subtyping mIF panel. Basal cell subtype was determined by expression of any of the 3 basal markers (KRT17, KRT5, S100A2), classical by any of the 3 classical markers (GATA6, CLDN18.2, TFF1) and co-expressor subtype by any combination of both basal and classical marker expression within a cell.

Supplementary Table.T10. Univariate and multivariable-adjusted Cox regression models for overall survival and disease-free survival according to tumor expression subtype by multiplex immunofluorescence

| Tumor subtype                  | Overall Survival |                      |                        |              |                                        |              | Disease-Free Survival |                      |                        |                  |                                        |                  |
|--------------------------------|------------------|----------------------|------------------------|--------------|----------------------------------------|--------------|-----------------------|----------------------|------------------------|------------------|----------------------------------------|------------------|
|                                | No. of patients  | Median survival (mo) | Univariate HR (95% CI) | P            | Multivariable HR (95% CI) <sup>a</sup> | P            | No. of patients       | Median survival (mo) | Univariate HR (95% CI) | P                | Multivariable HR (95% CI) <sup>a</sup> | P                |
| <b>Tumor subtype (2-class)</b> |                  |                      |                        |              |                                        |              |                       |                      |                        |                  |                                        |                  |
| Classical                      | 177              | 25.9                 | 1.00 (reference)       |              | 1.00 (reference)                       |              | 175                   | 14.3                 | 1.00 (reference)       |                  | 1.00 (reference)                       |                  |
| Basal                          | 112              | 16.7                 | 1.62(1.24-2.13)        | <b>0.001</b> | 1.40(1.04-1.87)                        | <b>0.02</b>  | 110                   | 9.9                  | 1.55(1.16-2.07)        | <b>0.003</b>     | 1.52(1.13-2.05)                        | <b>0.006</b>     |
| <b>Tumor subtype (3-class)</b> |                  |                      |                        |              |                                        |              |                       |                      |                        |                  |                                        |                  |
| Classical predominant          | 120              | 29.5                 | 1.00 (reference)       |              | 1.00 (reference)                       |              | 119                   | 17.6                 | 1.00 (reference)       |                  | 1.00 (reference)                       |                  |
| Mixed                          | 130              | 18.4                 | 1.65(1.24-2.21)        | <b>0.001</b> | 1.50(1.11-2.03)                        | <b>0.009</b> | 128                   | 10.7                 | 1.91(1.40-2.59)        | <b>&lt;0.001</b> | 1.93(1.40-2.65)                        | <b>&lt;0.001</b> |
| Basal predominant              | 39               | 15.7                 | 1.94(1.27-2.96)        | <b>0.002</b> | 1.27(0.79-2.05)                        | 0.30         | 38                    | 8.8                  | 1.82(1.14-2.91)        | <b>0.01</b>      | 1.60(0.99-2.60)                        | <b>0.06</b>      |

**Supplementary Table.T10. Univariate and multivariable-adjusted Cox regression models for overall survival and disease-free survival according to tumor expression subtype by multiplex immunofluorescence.** Cox proportional hazards regression models were applied to two-group and three-group classified tumor subtypes. Using the two-group classification, basal tumors were associated with worse overall survival (OS) and disease-free survival (DFS), compared with classical tumors. Using the three-group classification, mixed tumors were associated with intermediate outcomes with OS between basal-predominant and classical-predominant tumors.

<sup>a</sup>Cox proportional hazards regression model adjusted for age, sex, pathologic N stage (N0, N1, N2), tumor grade (well/moderately-/poorly-differentiated, unknown), lymphovascular invasion (negative, positive, unknown), receipt of perioperative treatment and resection margin status (R0, R1, R2, unknown). Disease-free survival: n=285; overall survival: n=289.

Supplementary Table.T11. Univariate and multivariable-adjusted cox-regression models for overall survival and disease-free survival according to basal-classical axis score.

| Subtype fraction                        | Overall survival |                  |                      |                        |                                        | Disease-free survival |                  |                      |                        |                                        |
|-----------------------------------------|------------------|------------------|----------------------|------------------------|----------------------------------------|-----------------------|------------------|----------------------|------------------------|----------------------------------------|
|                                         | No. of patients  | Median, IQR (%)  | Median survival (mo) | Univariate HR (95% CI) | Multivariable HR (95% CI) <sup>b</sup> | No. of patients       | Median, IQR (%)  | Median survival (mo) | Univariate HR (95% CI) | Multivariable HR (95% CI) <sup>b</sup> |
| <b>Basal-classical axis<sup>a</sup></b> |                  |                  |                      |                        |                                        |                       |                  |                      |                        |                                        |
| Quartile 1                              | 71               | 0.3 (0-1.4)      | 31.5                 | 1.00 (reference)       | 1.00 (reference)                       | 70                    | 0.3 (0-1.4)      | 16.9                 | 1.00 (reference)       | 1.00 (reference)                       |
| Quartile 2                              | 73               | 7.3 (3.8-11.1)   | 23.9                 | 1.55 (1.06-2.29)       | 1.49 (0.99-2.23)                       | 72                    | 7.2 (3.7-10.9)   | 14.1                 | 1.26 (0.84-1.89)       | 1.24 (0.81-1.89)                       |
| Quartile 3                              | 74               | 33.0 (25.0-47.3) | 16.9                 | 1.87 (1.27-2.75)       | 1.57 (1.05-2.36)                       | 74                    | 33.0 (25.0-47.3) | 10.5                 | 1.83 (1.24-2.71)       | 1.85 (1.22-2.81)                       |
| Quartile 4                              | 71               | 91.3 (75.9-99.2) | 16.7                 | 2.03 (1.38-3.00)       | 1.60 (1.05-2.44)                       | 69                    | 91.3 (75.9-99.2) | 9.8                  | 1.73 (1.14-2.61)       | 1.70 (1.11-2.60)                       |
| <i>P</i> <sub>trend</sub> <sup>c</sup>  |                  |                  |                      | <b>0.002</b>           | <b>0.028</b>                           |                       |                  |                      | <b>0.010</b>           | <b>0.018</b>                           |

**Supplementary Table.T11. Univariate and multivariable-adjusted Cox regression models for overall survival and disease-free survival according to basal-classical axis score.** For survival analyses, basal-classical axis score was split into quartiles with the lowest quartile as the referent and Cox proportional hazards regression models were applied. Increasing basal-classical axis score was associated with worse overall survival and disease-free survival. <sup>a</sup> Basal-classical axis score was derived from basal fraction taken as a percentage of total basal and classical cells per tumor. A higher score indicates a greater basal cell fraction while a lower score indicates a greater classical cell fraction within a tumor. Disease-free survival: n=285; overall survival: n=289. <sup>b</sup> Cox proportional hazards regression model adjusted for age, sex, pathologic N stage (N0, N1, N2), tumor grade (well/moderately-/poorly-differentiated, unknown), lymphovascular invasion (negative, positive, unknown), and resection margin status (R0, R1, R2, unknown). <sup>c</sup>  $P_{trend}$  calculated by the Wald  $\chi^2$  test.

Supplementary Table.T12. Univariate and multivariable-adjusted Cox regression models for overall survival and disease-free survival according to co-expressor cell fraction.

| Co-expressor cell fraction <sup>a</sup> | Overall survival |                  |                      |                        |                                        | Disease-free survival |                  |                      |                        |                                        |
|-----------------------------------------|------------------|------------------|----------------------|------------------------|----------------------------------------|-----------------------|------------------|----------------------|------------------------|----------------------------------------|
|                                         | No. of patients  | Median, IQR (%)  | Median survival (mo) | Univariate HR (95% CI) | Multivariable HR (95% CI) <sup>b</sup> | No. of patients       | Median, IQR (%)  | Median survival (mo) | Univariate HR (95% CI) | Multivariable HR (95% CI) <sup>b</sup> |
| Q1                                      | 71               | 0.2 (0-0.7)      | 25.8                 | 1.00 (reference)       | 1.00 (reference)                       | 70                    | 0.2 (0-0.7)      | 14.4                 | 1.00 (reference)       | 1.00 (reference)                       |
| Q2                                      | 73               | 3.1 (1.9-4.2)    | 16.7                 | 1.39 (0.96-2.02)       | 1.31 (0.87-1.96)                       | 72                    | 3.1 (1.9-4.2)    | 13.3                 | 1.09 (0.73-1.62)       | 0.86 (0.55-1.33)                       |
| Q3                                      | 74               | 10.9 (8.1-14.6)  | 24.2                 | 1.09 (0.75-1.60)       | 1.11 (0.73-1.68)                       | 72                    | 10.9 (8.0-14.6)  | 14.1                 | 1.05 (0.71-1.54)       | 0.99 (0.65-1.52)                       |
| Q4                                      | 71               | 32.1 (24.1-47.7) | 21.5                 | 1.37 (0.94-2.00)       | 1.28 (0.84-1.93)                       | 71                    | 32.1 (24.1-47.7) | 13.7                 | 1.14 (0.77-1.69)       | 1.09 (0.70-1.69)                       |
| <i>P<sub>trend</sub></i>                |                  |                  |                      | 0.278                  | 0.485                                  |                       |                  |                      | 0.581                  | 0.406                                  |



**Supplementary Table.T12. Univariate and multivariable-adjusted Cox regression models for overall survival and disease-free survival according to co-expressor cell fraction.** For survival analyses using Cox regression, tumors were divided into quartiles based on co-expressor fraction, with the lowest quartile as the referent. <sup>a</sup> Co-expressor cell fraction calculated by dividing the number of co-expressor cells by the sum of basal, classical, and co-expressor cells within a tumor. <sup>b</sup> Cox proportional hazards regression model adjusted for age, sex, pathologic N stage (N0, N1,N2), tumor grade (well/moderately-/poorly-differentiated, unknown), lymphovascular invasion (negative, positive, unknown), receipt of perioperative treatment, resection margin status (R0, R1, R2, unknown) and basal-classical axis score. <sup>c</sup>  $P_{trend}$  calculated by the Wald  $\chi^2$  test.

Supplementary Table.T13. Tumor subtype and associations with clinicopathological features

| Characteristic                              | Tumor subtype                            |                  |                                 | <i>P</i> <sup>a</sup> |
|---------------------------------------------|------------------------------------------|------------------|---------------------------------|-----------------------|
|                                             | Classical-<br>predominant<br>(N=120)     | Mixed<br>(N=130) | Basal-<br>predominant<br>(N=39) |                       |
| Gender                                      |                                          |                  |                                 | 0.13                  |
|                                             | Men                                      | 58(48%)          | 70(54%)                         | 26(67%)               |
|                                             | Women                                    | 62(52%)          | 60(46%)                         | 13(33%)               |
| Age (median, IQR), years                    | 68(61-73)                                | 66(59-71)        | 66(58-72)                       | 0.46                  |
| Race                                        |                                          |                  |                                 | 0.31                  |
|                                             | White                                    | 102(85%)         | 95(73%)                         | 32(82%)               |
|                                             | Black                                    | 2(2%)            | 3(2%)                           | 0(0)                  |
|                                             | Asian                                    | 6(5%)            | 13(10%)                         | 5(13%)                |
|                                             | Other                                    | 10(8%)           | 19(15%)                         | 2(5%)                 |
| pT stage (n, %)                             |                                          |                  |                                 | 0.08                  |
|                                             | T1-T2                                    | 98(82%)          | 95(73%)                         | 24(62%)               |
|                                             | T3-T4                                    | 22(18%)          | 35(27%)                         | 15(38%)               |
| pN stage (n, %)                             |                                          |                  |                                 | 0.26                  |
|                                             | N0                                       | 40(33%)          | 32(25%)                         | 13(33%)               |
|                                             | N1                                       | 48(40%)          | 48(37%)                         | 12(31%)               |
|                                             | N2                                       | 32(27%)          | 50(38%)                         | 14(36%)               |
| Tumor grade <sup>Δ</sup> (n, %)             |                                          |                  |                                 | 0.10                  |
|                                             | Well/Moderately differentiated           | 76(65%)          | 74(58%)                         | 16(41%)               |
|                                             | Poorly differentiated / Undifferentiated | 41(35%)          | 53(42%)                         | 23(59%)               |
| Lymphovascular invasion <sup>Ω</sup> (n, %) |                                          |                  |                                 | 0.13                  |
|                                             | Negative                                 | 60(50%)          | 49(38%)                         | 16(41%)               |
|                                             | Positive                                 | 45(38%)          | 68(52%)                         | 21(54%)               |
| Resection margin status (n, %)              |                                          |                  |                                 | 0.82                  |
|                                             | R0                                       | 62(52%)          | 63(48%)                         | 18(46%)               |
|                                             | R1                                       | 56(46%)          | 65(50%)                         | 20(51%)               |
|                                             | R2                                       | 1(1%)            | 2(2%)                           | 1(3%)                 |
|                                             | Rx (not evaluable)                       | 1(1%)            | 0(0)                            | 0(0)                  |

**Supplementary Table.T13. Tumor expression subtype and associations with clinicopathological features.** Associations between tumor subtype and clinicopathological features were explored using Fisher's exact test (categorical variables) and Wilcoxon rank-sum test (age). <sup>a</sup>*P* value for Fisher's exact test (categorical variables) and Wilcoxon rank-sum test (age). <sup>Δ</sup>6 cases with unknown tumor grade were removed from analysis. <sup>Ω</sup>30 cases with unknown lymphovascular invasion were removed from this analysis.

Supplementary Table.T14. Tumor expression subtype and association with tumor molecular characteristics

| <sup>a</sup> Molecular characteristic | Tumor subtype                                 |                           |                                          | <sup>b</sup> <i>P</i> |
|---------------------------------------|-----------------------------------------------|---------------------------|------------------------------------------|-----------------------|
|                                       | Classical-<br>predominant<br>(N=120)<br>N (%) | Mixed<br>(N=130)<br>N (%) | Basal-<br>predominant<br>(N=39)<br>N (%) |                       |
| <i>KRAS</i>                           |                                               |                           |                                          | 0.09                  |
|                                       | Wildtype                                      | 12 (11%)                  | 5 (4%)                                   | 1 (3%)                |
|                                       | Mutant                                        | 101 (89%)                 | 121 (96%)                                | 38 (97%)              |
| <i>CDKN2A</i>                         |                                               |                           |                                          | 0.68                  |
|                                       | Intact                                        | 42 (37%)                  | 40 (32%)                                 | 13 (33%)              |
|                                       | Loss                                          | 71 (63%)                  | 86 (68%)                                 | 26 (67%)              |
| <i>SMAD4</i>                          |                                               |                           |                                          | 0.95                  |
|                                       | Intact                                        | 55 (49%)                  | 64 (51%)                                 | 20 (51%)              |
|                                       | Loss                                          | 58 (51%)                  | 62 (49%)                                 | 19 (49%)              |
| <i>P53</i>                            |                                               |                           |                                          | 0.16                  |
|                                       | Wildtype                                      | 45 (40%)                  | 42 (33%)                                 | 9 (23%)               |
|                                       | Altered                                       | 68 (60%)                  | 84 (67%)                                 | 30 (77%)              |
| KRAS Copy number                      |                                               |                           |                                          | 0.003                 |
|                                       | Gain                                          | 9 (8%)                    | 9 (8%)                                   | 10 (28%)              |
|                                       | Normal copy                                   | 100 (92%)                 | 101 (92%)                                | 25 (72%)              |

**Supplementary Table.T14. Tumor expression subtype and association with tumor molecular characteristics.** Molecular annotation for the primary resection cohort was performed for KRAS, CDKN2A, SMAD4 and TP53, the four main driver genes altered in pancreatic ductal adenocarcinoma. <sup>a</sup>KRAS status was determined by next generation sequencing (or pyrosequencing if predefined NGS coverage metrics were not met) and classified as mutant or wild-type. CDKN2A and SMAD4 status was determined by immunohistochemistry and classified as intact or lost. TP53 status was determined by combining IHC and sequencing data to make an integrated call as wild-type or altered. Immunohistochemistry and sequencing methodologies were described in detail in <sup>5</sup>. <sup>b</sup>P value for Fisher's exact test.

Supplementary Table.T15. Comparison of subtype fractions between primary and metastatic PDAC

|                              | Cohort          |                   | <i>a</i> p       |
|------------------------------|-----------------|-------------------|------------------|
|                              | Primary (N=289) | Metastatic (N=37) |                  |
| Subtype fraction             |                 |                   | <b>&lt;0.001</b> |
| Basal %, median (IQR)        | 12.9(2.1-45.2)  | 16.0(2.8-60.9)    | <0.001           |
| Classical %, median (IQR)    | 68.9(27.9-92.1) | 57.9(6.2-85.3)    | <0.001           |
| Co-expressor %, median (IQR) | 5.7(1.2-18.1)   | 11.3(2.1-26.0)    | <0.001           |
| Tumor subtype                |                 |                   | <b>0.0010</b>    |
| Classical-predominant, N (%) | 85 (29%)        | 7 (19%)           | <0.001           |
| Mixed, N (%)                 | 164 (57%)       | 18 (49%)          | <0.001           |
| Basal-predominant, N (%)     | 40 (14%)        | 12 (32%)          | <0.0001          |

**Supplementary Table.T15. Comparison of subtype fractions between primary and metastatic PDAC.** Comparisons were made between primary and metastatic PDAC for subtype fraction and tumor subtype. Significant differences were observed for both. <sup>a</sup>*P* value for Chi<sup>2</sup> test and Post-hoc Chi<sup>2</sup> test.
